# Supplementary material
Source: PubMed Central journal article supplement (PMC7888536)
Supplement: NIHMS1667222-supplement-Supplemental_materials.pdf [file NIHMS1667222-supplement-Supplemental_materials.pdf]

# Supporting information

## An engineered glutamate in biosynthetic models of heme-copper oxidases drives complete product selectivity by tuning the hydrogen bonding network

Igor D. Petrik<sup>†</sup>, Roman Davydov<sup>‡</sup>, Maximilian Kahle<sup>§</sup>, Braddock Sandoval<sup>†</sup>, Sudharsan Dwaraknath<sup>†</sup>, Pia Adelroth<sup>§,\*</sup>, Brian Hoffman<sup>‡,\*</sup>, Yi Lu<sup>†,\*</sup>

<sup>†</sup> Department of Chemistry, University of Illinois at Urbana-Champaign, Urbana, Illinois 61801

<sup>‡</sup> The Department of Chemistry, Northwestern University, Evanston, Illinois 60201

<sup>§</sup> Department of Biochemistry and Biophysics, Arrhenius Laboratories for Natural Sciences, Stockholm University, SE-106 91 Stockholm, Sweden

\*Correspondence to: Yi Lu <[yi-lu@illinois.edu](mailto:yi-lu@illinois.edu)>; Brian M Hoffman <[bmh@northwestern.edu](mailto:bmh@northwestern.edu)>; Pia Adelroth <[pia.adelroth@dbb.su.se](mailto:pia.adelroth@dbb.su.se)>

### Tables

**Table S1.** Oxygen affinities of myoglobin mutants

| Protein                              | $k_{\text{on}}$ ( $\mu\text{M}^{-1} \text{s}^{-1}$ ) | $k_{\text{off}}$ ( $\text{s}^{-1}$ ) | $K_{\text{d}}$ ( $k_{\text{off}}/k_{\text{on}}$ ; $\mu\text{M}$ ) |
|--------------------------------------|------------------------------------------------------|--------------------------------------|-------------------------------------------------------------------|
| wtMb <sup>1</sup>                    | 8.8                                                  | 8.3                                  | 0.94                                                              |
| Cu <sub>B</sub> Mb                   | 0.041 ± 0.002                                        | 9 ± 1                                | 220 ± 30                                                          |
| I107E-Cu <sub>B</sub> Mb             | 0.19 ± 0.01                                          | 4 ± 4                                | 20 ± 20                                                           |
| F33Y-Cu <sub>B</sub> Mb <sup>2</sup> | 0.021 ± 0.002                                        | 14 ± 1                               | 700 ± 80                                                          |
| I107E-F33Y-Cu <sub>B</sub> Mb        | 0.19 ± 0.01                                          | 26 ± 4                               | 140 ± 20                                                          |

**Table S2.** Data collection and refinement statistics for oxy-F33Y Cu<sub>B</sub>Mb structure.

| Sample                                     | I107E Cu <sub>B</sub> Mb (7KYR) | I107E F33Y Cu <sub>B</sub> Mb (7L3U)          |
|--------------------------------------------|---------------------------------|-----------------------------------------------|
| <b>Data Collection</b>                     |                                 |                                               |
| Source                                     | NLSL x29                        | APS 21-ID-G                                   |
| Date                                       | 2014-08-23                      | 2013-06-04                                    |
| Detector                                   | ADSC Q315r-906                  | MAR/Rayonix MX300 CCD                         |
| Wavelength (Å)                             | 1.075                           | 0.9786                                        |
| <b>Data Reduction</b>                      |                                 |                                               |
| Software                                   | HKL2000 v2.3.8 (Linux)          | HKL2000 v2.3.1 (Linux)                        |
| Spacegroup                                 | P2 <sub>1</sub>                 | P2 <sub>1</sub> 2 <sub>1</sub> 2 <sub>1</sub> |
| Unit cell (a x b x c; Å)                   | 34.02 x 31.72 x 71.28           | 39.67 x 47.87 x 77.88                         |
| (β; °)                                     | 102.4                           | --                                            |
| Resolution range (highest shell)           | 50-1.70 (1.76-1.70)             | 50-1.48 (1.51-1.47)                           |
| Overall B-factor, ML (Å <sup>2</sup> )     | 23.28                           | 18.84                                         |
| Overall B-factor, Wilson (Å <sup>2</sup> ) | 25.02                           | 20.18                                         |
| Unique reflection                          | 16343 (1600)                    | 25784 (1268)                                  |
| Completeness (%)                           | 99.8 (98.5)                     | 99.8 (99.9)                                   |
| Redundancy                                 | 7.6 (5.8)                       | 3.8 (3.7)                                     |
| <I/σ(I)>                                   | 11.5                            | 12.0                                          |
| CC <sub>1/2</sub>                          | (0.843)                         | --                                            |
| R <sub>merge/symm</sub>                    | 0.073 (0.635)                   | 0.047 (0.534)                                 |
| R <sub>pim</sub>                           | 0.025 (0.285)                   | --                                            |
| R <sub>meas/rim</sub>                      | 0.077 (0.698)                   | --                                            |
| <b>Refinement</b>                          |                                 |                                               |
| Software                                   | Phenix v1.19rc7_4070 (Win)      | Phenix v1.19rc7_4070 (Win)                    |
| Resolution range (highest shell)           | 34.82-1.708 (1.735-1.708)       | 20.48-1.467 (1.499-1.469)                     |
| Reflections                                | 31359 (1171)                    | 48282 (2646)                                  |
| Completeness (%)                           | 99.1 (83.3)                     | 98.84 (86.53)                                 |
| Free set (%; random)                       | 10                              | 4.74                                          |
| R <sub>work</sub>                          | 0.166 (0.271)                   | 0.201 (0.318)                                 |
| R <sub>free</sub>                          | 0.210 (0.331)                   | 0.234 (0.397)                                 |
| Molecules in ASU                           | 1                               | 1                                             |
| # of Atoms                                 |                                 |                                               |
| Protein                                    | 1234                            | 1300                                          |
| Heme                                       | 43                              | 43                                            |
| Solvent                                    | 128                             | 145                                           |
| Other                                      | 47                              | --                                            |
| Average Isotropic B-factor                 | 32.61                           | 27.79                                         |
| Protein                                    | 31.44                           | 26.89                                         |
| Heme                                       | 27.03                           | 25.22                                         |
| Solvent                                    | 42.11                           | 36.62                                         |
| Other                                      | 59.30                           | --                                            |
| Standard Uncertainty (ML)                  | 0.19                            | 0.20                                          |
| Bond RMSD (Å)                              | 0.014                           | 0.015                                         |
| Angle RMSD (Å)                             | 0.92                            | 1.921                                         |
| Ramachandran favored/disallowed (%)        | 98/0.00                         | 96/0.00                                       |

**Table S3.** Data collection and refinement statistics for oxy-F33Y Cu<sub>B</sub>Mb structure.

| Sample                                     | Oxy-I107E-Cu <sub>B</sub> Mb (7L3Y)                                                  |
|--------------------------------------------|--------------------------------------------------------------------------------------|
| <b>Data Collection</b>                     |                                                                                      |
| Source                                     | SSRL 11-1                                                                            |
| Date                                       | 2015-07-20                                                                           |
| Detector                                   | DECTRIS Pilatus 6M                                                                   |
| Wavelength (Å)                             | 0.98                                                                                 |
| <b>Data Reduction</b>                      |                                                                                      |
| Software                                   | XDS v2015-03-01<br>Pointless v1.9.33<br>Aimless v0.5.12<br>Truncate v6.5.013 (Linux) |
| Spacegroup                                 | P2 <sub>1</sub> 2 <sub>1</sub> 2 <sub>1</sub>                                        |
| Unit cell (a x b x c; Å)                   | 39.84 x 46.98 x 78.03                                                                |
| Resolution range (highest shell)           | 39-1.18 (1.20-1.18)                                                                  |
| Overall B-factor, ML (Å <sup>2</sup> )     | 7.19                                                                                 |
| Overall B-factor, Wilson (Å <sup>2</sup> ) | 11.18                                                                                |
| Unique reflection                          | 47352 (1510)                                                                         |
| Completeness (%)                           | 97.0 (63.4)                                                                          |
| Redundancy                                 | 3.9 (2.1)                                                                            |
| <I/σ(I)>                                   | 31.7 (4.1)                                                                           |
| CC <sub>1/2</sub>                          | (0.902)                                                                              |
| R <sub>merge/symm</sub>                    | 0.024 (0.216)                                                                        |
| R <sub>pim</sub>                           | 0.013 (0.169)                                                                        |
| R <sub>meas/rim</sub>                      | 0.028 (0.275)                                                                        |
| <b>Refinement</b>                          |                                                                                      |
| Software                                   | Phenix v1.19rc7_4070 (Win)                                                           |
| Resolution range (highest shell)           | 39.02-1.18 (1.19-1.18)                                                               |
| Reflections                                | 86347 (1303)                                                                         |
| Completeness (%)                           | 92.81 (40.7)                                                                         |
| Free set (%; random)                       | 4.77                                                                                 |
| R <sub>work</sub>                          | 0.1566 (0.2408)                                                                      |
| R <sub>free</sub>                          | 0.1902 (0.3196)                                                                      |
| Molecules in ASU                           | 1                                                                                    |
| # of Atoms                                 |                                                                                      |
| Protein                                    | 1282                                                                                 |
| Heme + Oxygen                              | 45                                                                                   |
| Solvent                                    | 299                                                                                  |
| Average Isotropic B-factor                 | 17.26                                                                                |
| Protein                                    | 15.24                                                                                |
| Heme + Oxygen                              | 10.53                                                                                |
| Solvent                                    | 26.96                                                                                |
| Standard Uncertainty (ML)                  | 0.11                                                                                 |
| Bond RMSD (Å)                              | 0.013                                                                                |
| Angle RMSD (Å)                             | 1.397                                                                                |
| Ramachandran favored/disallowed (%)        | 98/0.00                                                                              |

## Figures

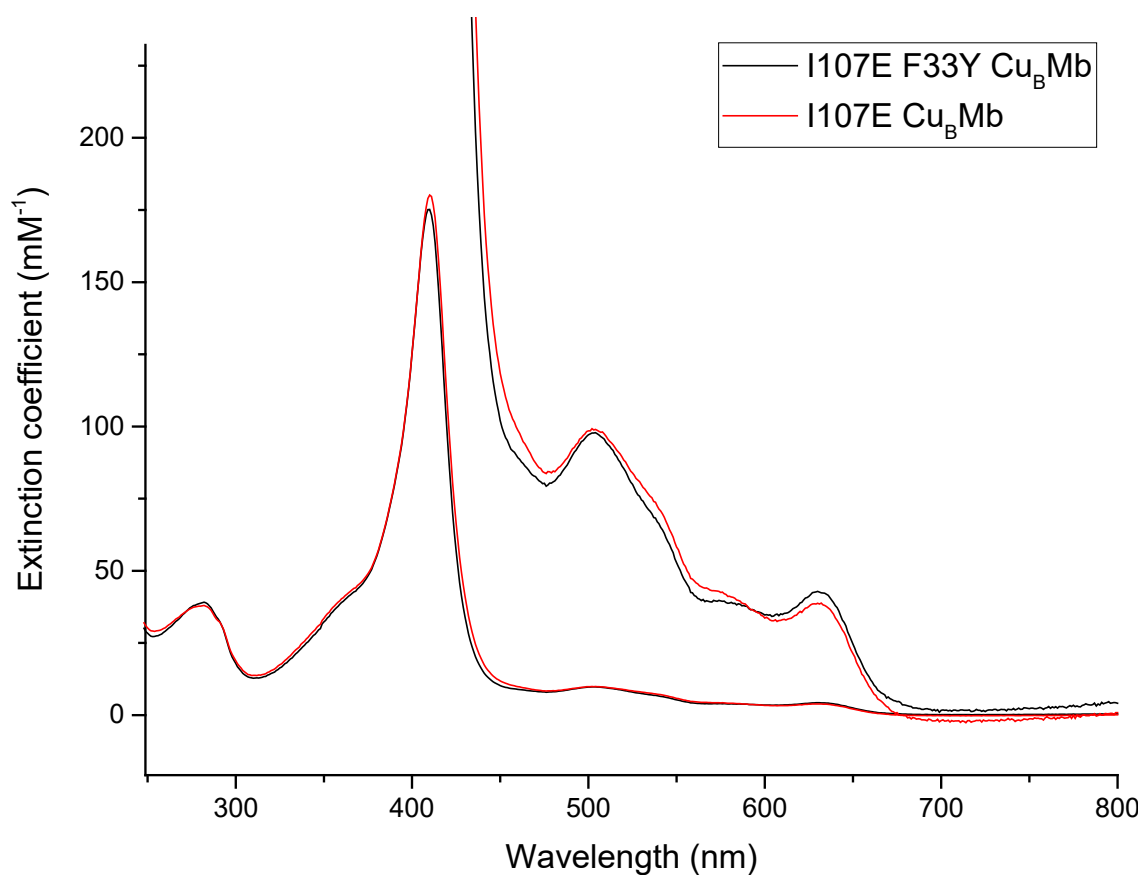

**Figure S1.** Resting state spectra of I107E-Cu<sub>B</sub>Mb and I107E/F33Y-Cu<sub>B</sub>Mb.

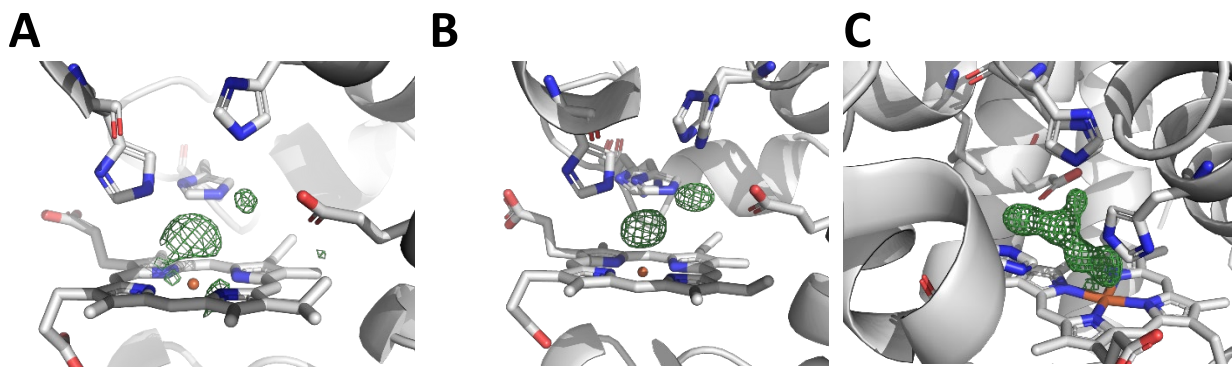

**Figure S2.** Omit maps of the distal pocket with the contents of the distal pocket omitted: (A) resting state I107E Cu<sub>B</sub>Mb contoured at 4-sigma; (B) resting state I107E F33Y Cu<sub>B</sub>Mb contoured at 4-sigma; (C) oxy-I107E Cu<sub>B</sub>Mb contoured at 3-sigma.

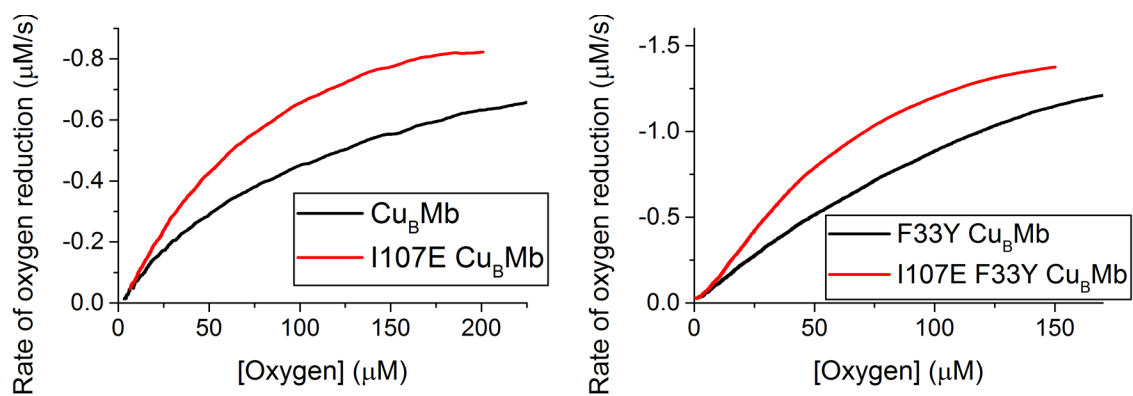

**Figure S3.** Oxygen consumption rate curves as a function of oxygen concentration.

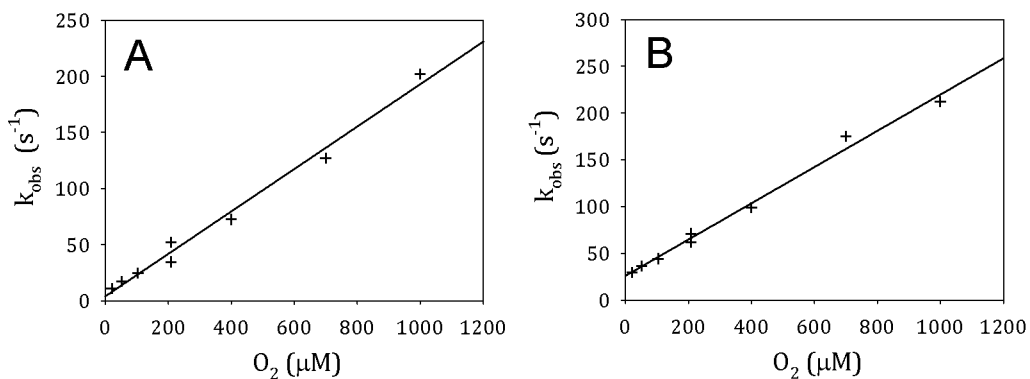

**Figure S4.** The rate constants for oxygen binding as a function of oxygen concentration for I107E-Cu<sub>B</sub>Mb (A) and I107/F33Y-Cu<sub>B</sub>Mb (B). The fitted lines were used to calculate the oxygen affinities ( $K_d$ ) in Table S1.

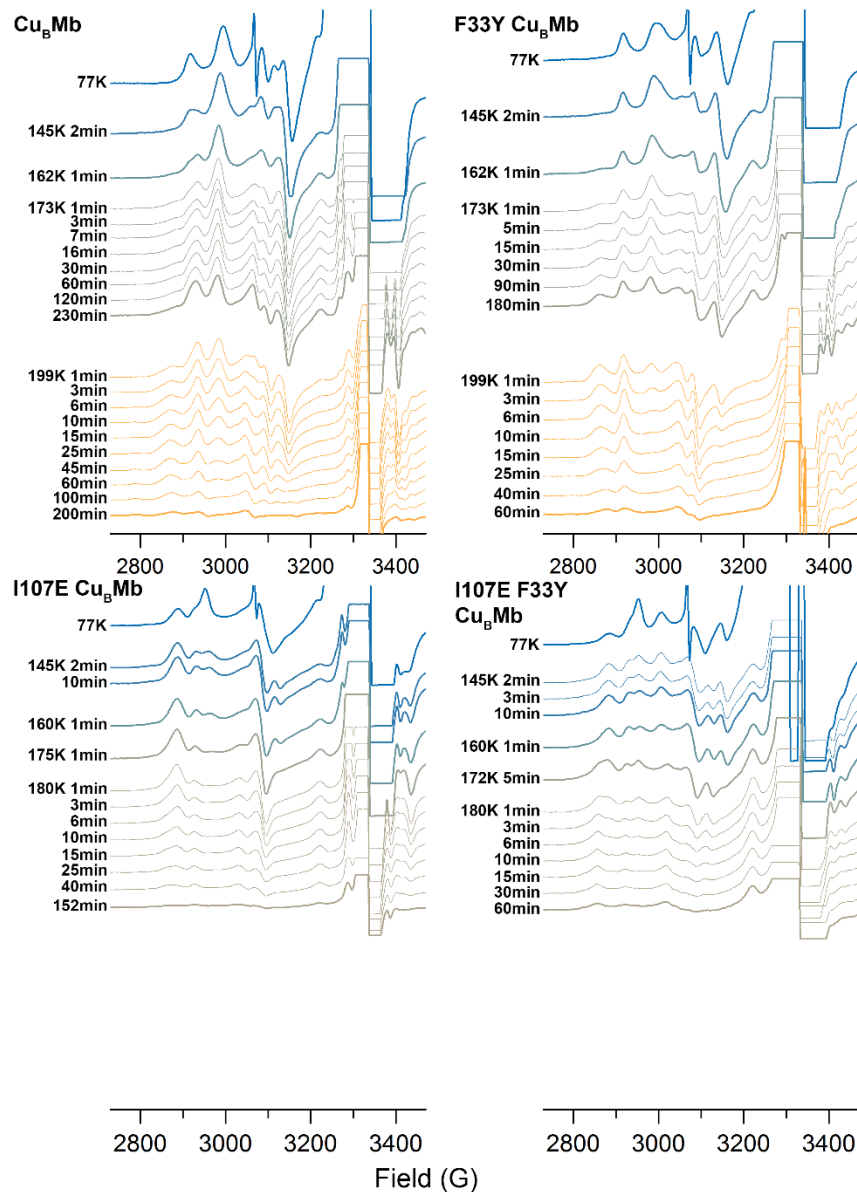

**Figure S5.** Full EPR spectral sets of annealing experiments

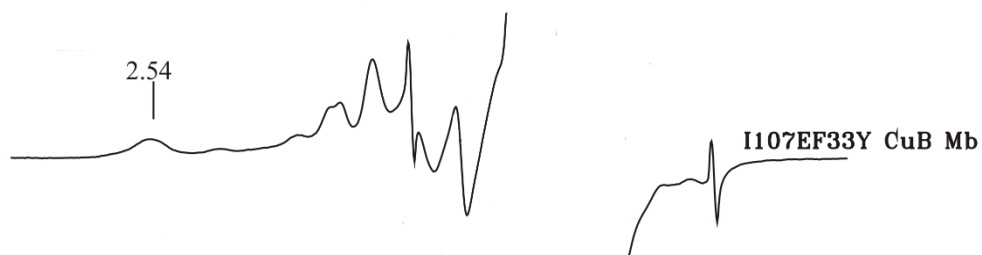

**Figure S6.** EPR spectrum of oxy-I107E/F33Y-Cu<sub>B</sub>Mb after cryoreduction-annealing-cryoreduction, showing ferric hydroxo signal.

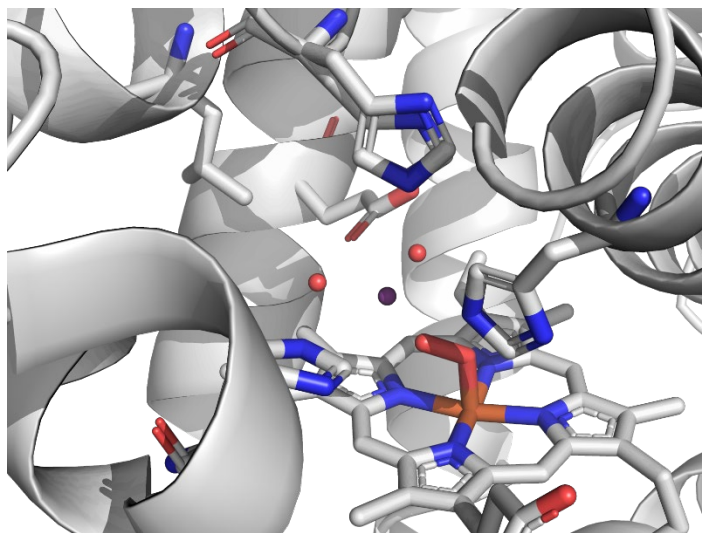

**Figure S7.** View of both configurations of the active site, with (red waters) and without (purple water) O<sub>2</sub> bound. Both configurations refine to ~50% occupancy, with B-factors of these atoms in the range of 10-15, similar to the surrounding protein.

## References

- (1) Carver, T. E.; Brantley, R. E.; Singleton, E. W.; Arduini, R. M.; Quillin, M. L.; Phillips, G. N.; Olson, J. S. A Novel Site-Directed Mutant of Myoglobin with an Unusually High O<sub>2</sub> Affinity and Low Autooxidation Rate. *J. Biol. Chem.* **1992**, *267* (20), 14443-14450.
- (2) Bhagi-Damodaran, A.; Kahle, M.; Shi, Y.; Zhang, Y.; Ädelroth, P.; Lu, Y. Insights Into How Heme Reduction Potentials Modulate Enzymatic Activities of a Myoglobin-Based Functional Oxidase. *Angew. Chem. Int. Ed.* **2017**, *56* (23), 6622-6626. <https://doi.org/10.1002/anie.201701916>.
